# Supplementary material for: Strategies for the Management of Spike Protein-Related Pathology
Source: Preprints.org preprint supplement (doi:10.20944/preprints202303.0344.v2), 2023-04-12
Supplement: Supplementary file 1 [file supplementary]

Supplementary Table 1: Overview of Clinical Trials for Long-covid and Covid-19 vaccine injury

| Intervention class | Intervention                            | Clinical trials                                                                                                                                                                  |
|--------------------|-----------------------------------------|----------------------------------------------------------------------------------------------------------------------------------------------------------------------------------|
| Lifestyle          | Exercise                                | NCT05566483<br>NCT05543408<br>NCT05530317<br>NCT05453175<br>NCT05360563<br>NCT05204511<br>NCT05094622<br>NCT04950725<br>NCT04900961<br>NCT04898205                               |
|                    | Mindfulness                             | NCT05566379<br>NCT05419219<br>NCT05268523<br>NCT05139979<br>NCT05107440<br>NCT04854772<br>NCT05119608<br>NCT05566379                                                             |
|                    | Wearable                                | NCT05507190<br>NCT05228665<br>NCT05019963                                                                                                                                        |
|                    | Coaching                                | NCT05453201<br>NCT05422924<br>NCT05389592<br>NCT05338749<br>NCT05254301<br>NCT05167266<br>NCT04961333                                                                            |
|                    | Physio/Rehab                            | NCT05453188<br>NCT05398692<br>NCT05373043<br>NCT05244044<br>NCT05238415<br>NCT05196529<br>NCT05040893<br>NCT05003271<br>NCT04996212<br>NCT04841759<br>NCT04649918<br>NCT05566483 |
|                    | Transcranial direct current stimulation | NCT05389592<br>NCT05359770<br>NCT05289115<br>NCT05252481<br>NCT05126511<br>NCT05092516<br>NCT04890483                                                                            |

|                                                                                  |                              |                                             |
|----------------------------------------------------------------------------------|------------------------------|---------------------------------------------|
|                                                                                  | Acupuncture                  | NCT05212688                                 |
|                                                                                  | Vagus nerve stimulation      | NCT05205577                                 |
|                                                                                  | Electrical stimulation       | NCT05200858<br>NCT05190718                  |
|                                                                                  | Homeopathy                   | NCT05104749                                 |
|                                                                                  | Osteopathy                   | NCT05012826<br>NCT04928456*<br>NCT05069636* |
|                                                                                  | Singing                      | NCT04810065                                 |
| Probiotics                                                                       | Faecal Microbiota Transplant | NCT05556733                                 |
|                                                                                  | Probiotic supplement         | NCT05080244<br>NCT05195151*                 |
| Plasmapheresis                                                                   | Plasma transfer              | NCT05543590<br>NCT05445674                  |
| Anti-inflammatory<br>/antioxidant<br>/mitochondrial<br>/metabolism<br>modulators | Echinochrome A               | NCT05531019                                 |
|                                                                                  | Ibudilast                    | NCT05513560                                 |
|                                                                                  | Mitoquinone                  | NCT05373043                                 |
|                                                                                  | Prospekta                    | <b>NCT05074888</b>                          |
|                                                                                  | Coenzyme Q10                 | NCT04960215                                 |
|                                                                                  | RSLV-132                     | NCT04944121                                 |
|                                                                                  | Niagen                       | NCT04809974                                 |
|                                                                                  | NAD+                         | NCT04604704                                 |
|                                                                                  | metformin                    | NCT03996538*                                |
|                                                                                  | Ketogenic diet               | NCT05163743*                                |
| Blood Thinners                                                                   | Pentoxifylline               | NCT05513560                                 |
|                                                                                  | Atorvastatin (statin)        | NCT04904536                                 |
|                                                                                  | Plant stanol esters          | NCT04844346                                 |

|                         |                                                         |                                           |
|-------------------------|---------------------------------------------------------|-------------------------------------------|
| Immunomodulators        | Temelimab                                               | NCT05497089                               |
|                         | human immunoglobulin                                    | NCT05220280                               |
|                         | MABPACs                                                 | NCT05013723                               |
|                         | Sirolimus (rapamycin)                                   | NCT04948203                               |
|                         | Ampion                                                  | NCT04880161                               |
|                         | Montelukast                                             | NCT04695704                               |
|                         | Leronlimab                                              | NCT04678830                               |
|                         | Zilucoplan                                              | NCT04382755                               |
|                         | ergoferon                                               | NCT05069649                               |
|                         | mycophenolate mofetil/mycophenolic acid or azathioprine | NCT05060991*                              |
|                         | Rituximab                                               | NCT04877496*                              |
|                         | LYT-100 (Deupirfenidone)                                | NCT04652518                               |
| Heart medication        | Ivabradine                                              | NCT05481177                               |
|                         | Metoprolol Succinate                                    | NCT05096884                               |
| Fibromyalgia medication | TNX-102 SL                                              | NCT05472090                               |
| Hemp/CBD                | Xltranplus, Xltran                                      | NCT05467904                               |
|                         | CBD                                                     | NCT04997395<br>NCT04828668<br>NCT04777981 |
| Oxygen therapies        | portable oxygen concentrator                            | NCT05212831                               |
|                         | Hyperbaric oxygen                                       | NCT04905888<br>NCT04842448                |
| Stem cells              | bone marrow-derived mesenchymal stem cells              | NCT05116761                               |
|                         | Allogeneic Adipose-Derived Mesenchymal Stem Cells       | NCT04992247                               |
| Nootropic               | Prospekta                                               | <b>NCT05074888</b>                        |
| Antidepressant          | Vortioxetine                                            | NCT05047952                               |

|                 |                                                                   |              |
|-----------------|-------------------------------------------------------------------|--------------|
|                 | Pimozide (For tinnitus specifically)                              | NCT05507372  |
| Nasal spray     | S-1226                                                            | NCT04949386  |
|                 | Sodium pyruvate                                                   | NCT04871815  |
| Adaptogens      | ADAPT-232                                                         | NCT04795557  |
| Flavonoids      | Geneisten (BIO 300)                                               | NCT04482595  |
|                 | Mushroom mixture (Fomitopsis officinalis and Trametes versicolor) | NCT04951336* |
| Biologics       | Zofin (derived from amniotic fluid)                               | NCT05228899  |
| Dietary support | Iron                                                              | NCT04915820* |
| Antibiotics     | Azithromycin                                                      | NCT04699097  |

Clinical trials are conducted for a long period unless otherwise stated. Clinical trials are for long Covid unless otherwise stated. \*Vaccine immune response. † Adverse reactions to vaccination adverse reaction.
